# Supplementary material for: Evaluating Barriers on Biogas Technology Adoption in China: The Moderating Role of Awareness and Technology Understanding
Source: Frontiers journal article supplement (doi:10.3389/fenvs.2022.887084), 2022-07-22
Supplement: Data_Sheet_1.pdf [file Data_Sheet_1.pdf]

## Appendix A

**Table A1.** Grade of questions and how respondents (biogas plant owners) contradicted the semi-structured interview. Part A: Demographic characteristics of the respondents (biogas plant owners).

| <b>Part: A Demographic feature of the Respondents (biogas plant owners)</b> |                        |                  |          |
|-----------------------------------------------------------------------------|------------------------|------------------|----------|
| <b>Variables</b>                                                            | <b>Characteristics</b> | <b>Frequency</b> | <b>%</b> |
| Gender                                                                      | Male                   | 44               | 86.27    |
|                                                                             | Female                 | 7                | 13.7     |
| Age                                                                         | Less than 25           | 3                | 5.9      |
|                                                                             | 26–30                  | 7                | 13.7     |
|                                                                             | 31–40                  | 11               | 21.56    |
|                                                                             | 41–55                  | 13               | 25.49    |
|                                                                             | 56–65                  | 10               | 19.6     |
|                                                                             | 65 and above           | 7                | 13.7     |
| Owner's education                                                           | Under metric           | 18               | 35.29    |
|                                                                             | Metric                 | 19               | 37.25    |
|                                                                             | Faculty of Arts        | 11               | 21.56    |
|                                                                             | Bachelor               | 7                | 13.7     |
|                                                                             | Master                 | 6                | 11.76    |
| Owner's experience                                                          | 1–2 years              | 21               | 41.17    |
|                                                                             | 3–4 years              | 11               | 21.56    |
|                                                                             | 5–6 years              | 7                | 13.7     |
|                                                                             | 7–8 years              | 5                | 9.8      |
|                                                                             | 9–10 years             | 3                | 5.9      |
|                                                                             | 11- and above          | 4                | 7.8      |
| Biogas plant names, currently working Floating drum                         |                        |                  |          |

|                               |    |       |
|-------------------------------|----|-------|
| A mild-steel gas storage drum | 9  | 17.64 |
| inverted over the slurry      | 8  | 15.68 |
| Fixed drum                    |    |       |
| Chinese fixed-dome plant      | 7  | 13.7  |
| Janata model                  | 12 | 23.52 |
| Deenbandhu                    | 9  | 17.64 |
| Camartec model                | 6  | 11.76 |

**Table A2.** Part B: Influencing factors of sustainable improvement of biogas plant adoption.

| Variables                                      | Items | Questions                                                                                   | %    |
|------------------------------------------------|-------|---------------------------------------------------------------------------------------------|------|
| Availability of technicians for biogas plants  | ABT1  | The availability of technicians is a supportive element to adopting biogas plant            | 12.3 |
|                                                | ABT2  | The technician's availability can enhance the level of trust for biogas plant owners        | 19.2 |
|                                                | ABT3  | A trained technician can save time for biogas plant owners with the easy availability       | 14.3 |
|                                                | ABT4  | Expert technicians of a biogas plant can play a better role in economic development         | 13.2 |
|                                                | ABT5  | Easy availability of technicians can reduce the fear of adopting biogas plant               | 17.2 |
|                                                | ABT6  | The repairing facility of a biogas plant can enhance the sale capacity                      | 6.4  |
|                                                | ABT7  | Biogas plant repairing security can make careless about the price to the purchaser          | 11.9 |
|                                                | ABT8  | The regular biogas plant visit of technicians is an attractive element for the plant owners | 5.5  |
| Operational and maintenance government support | OMGS1 | Operational and maintenance government support can enhance biogas plant adaptability        | 20.3 |

|                                     |       |                                                                                                                         |      |
|-------------------------------------|-------|-------------------------------------------------------------------------------------------------------------------------|------|
|                                     | OMGS2 | villagers can adopt biogas plants with confidence through operational and maintenance government support                | 19.8 |
|                                     | OMGS3 | The sale turnover of a biogas plant can be increased through operational and maintenance government support             | 14.5 |
|                                     | OMGS4 | Operational and maintenance expenditure paid by the government for biogas plants can attract farmers to adopt           | 23.5 |
|                                     | OMGS5 | There is a need to encourage rural areas to adopt biogas plants by giving them an incentive and operational support     | 21.9 |
|                                     | LCCP1 | There is a need to adopt a low-cost and clear policy by the government to encourage biogas plant users                  | 28.6 |
| Low-cost and clear policy           | LCCP2 | A low-cost and clear policy for biogas plants can reduce the load of grid-connected energy due to biogas plant adoption | 14.3 |
|                                     | LCCP3 | More than 60% of the population is connected with rural areas, and we need to motivate them to adopt biogas plant       | 12.4 |
|                                     | LCCP4 | A low-cost and clear policy for biogas plants is an attractive element for off-grid areas and farmers                   | 10.1 |
|                                     | LCCP5 | Renewable energy can play an important role in removing energy crises through clear policy and low-cost biogas plant    | 17.5 |
|                                     | LCCP6 | A cost-effective renewable energy policy can encourage the biogas plant users                                           | 9.7  |
|                                     | LCCP7 | Government needs to revise its renewable energy policy to motivate the off-grid rural farmers for biogas plant adoption | 7.4  |
|                                     | USPQ1 | User satisfaction and plant quality are important to attract new biogas plant users                                     | 25.2 |
| User satisfaction and plant-quality | USPQ2 | plant quality increases the satisfaction of currently using biogas plants                                               | 21.6 |
|                                     | USPQ3 | Biogas plant quality can induce new users by analyzing the plant performance of current users                           | 18.9 |
|                                     | USPQ4 | The current user's satisfaction is important by using biogas plant for new users and investors                          | 16.7 |
|                                     | USPQ5 | Biogas plant quality with current user satisfaction can play an important role in reducing the energy crisis in China   | 17.6 |

|                                     |         |                                                                                                                        |      |
|-------------------------------------|---------|------------------------------------------------------------------------------------------------------------------------|------|
| Awareness and understanding of AOBT | AUAOBT1 | Awareness and understanding of adopting biogas technology is a critical issue                                          | 31.4 |
|                                     | AUAOBT2 | Awareness of biogas plant benefits is needed to the rural area farmers                                                 | 17.6 |
|                                     | AUAOBT3 | Renewable energy-related government institutions should provide information and awareness to the villagers             | 11.8 |
|                                     | AUAOBT4 | Cost-effective energy can be produced through the awareness of the biogas plant                                        | 13.9 |
|                                     | AUAOBT5 | A proper understanding of biogas plants can enhance the satisfaction level of plant users                              | 9.8  |
|                                     | AUAOBT6 | There is a lack of awareness and understanding of operating biogas plants, benefits, and quantity of energy production | 15.5 |
| Adoption of biogas technology       | AT1     | There is hesitation in adopting biogas technology the rural investor and common farmers                                | 24.3 |
|                                     | AT2     | The government can authorize the dealer for biogas and information provider                                            | 21.4 |
|                                     | AT3     | A biogas plant is the best energy choice for farmers to reduce their energy costs and energy shortage                  | 16.2 |
|                                     | AT4     | Farmers can easily perform their activities at a low cost by adopting biogas technology                                | 19.5 |
|                                     | AT5     | The farmers of rural areas need to adopt biogas technology to use animal dung cake                                     | 8.4  |
|                                     | AT6     | There is a lack of information about biogas technology in rural areas to adopt and enjoy benefits                      | 10.2 |

---
